# Supplementary material for: Cultivated grasslands present a higher soil organic carbon sequestration efficiency under leguminous than under gramineous species
Source: Copernicus journal article supplement (doi:10.5194/se-2016-109), 2016-09-12
Supplement: Supplementary file [file se-2016-109-AC1-supplement.pdf]

1 **MS-modified version**

2 **Cultivated grasslands present a higher soil organic carbon sequestration efficiency under leguminous**  
3 **than under gramineous species**

4 Yu Liu<sup>a,b</sup>, Fu-Ping Tian<sup>c</sup>, Peng-Yan Jia<sup>a,b</sup>, Jing-Ge Zhang<sup>a,b</sup>, Gao-Lin Wu<sup>a,b\*</sup>

5 <sup>a</sup>State Key Laboratory of Soil Erosion and Dryland Farming on the Loess Plateau, Institute of Soil and Water  
6 Conservation, Chinese Academy of Sciences and Ministry of Water Resources, Yangling Shaanxi 712100, China;

7 <sup>b</sup>Institute of Soil and Water Conservation, Northwest A&F University, Yangling Shaanxi 712100, China;

8 <sup>c</sup>The Lanzhou Scientific Observation and Experiment Field Station of Ministry of Agriculture for Ecological System in the Loess  
9 Plateau Area, Lanzhou Institute of Animal and Veterinary Pharmaceutics Sciences, Chinese Academy of Agricultural Sciences,  
10 Lanzhou, Gansu 730050 China;

11 \* Corresponding author e-mail address: [gaolinwu@gmail.com](mailto:gaolinwu@gmail.com) (G.L. Wu)

12 **ABSTRACT**

13 The establishment of grasslands on abandoned cropland has been proposed as an effective method ~~of to~~  
14 mitigating climate change by increasing soil organic carbon (SOC) storage. In this study, five cultivated  
15 grasslands ~~were established~~ (three leguminous species ~~*Coronilla varia*, *Onobrychis viciaefolia*, *Medicago*~~  
16 ~~*sativa*~~, and two gramineous species ~~*Poa annua*, *Agropyron cristatum*~~), one uncultivated, and one natural  
17 grassland were studied to examine how the SOC storage, sequestration rate and sequestration efficiency to  
18 change for 5 years restoration in semi-arid area. Our results showed that ~~the~~ cultivated leguminous  
19 grasslands had greater total biomass, SOC storage, SOC sequestration rate and efficiency than gramineous  
20 grasslands, abandoned cropland, and natural grassland. The greater soil carbon (C) accumulation in  
21 leguminous grassland was mainly attributed to the capacity to incorporating carbon and the higher biomass  
22 production. Leguminous grasslands accumulated more SOC than gramineous grasslands by 0.64 Mg C<sub>2</sub>ha<sup>-1</sup>  
23 yr<sup>-1</sup>. The average SOC sequestration efficiency in leguminous grassland (1.00) was about 2 times greater than  
24 gramineous grassland (0.34). Root nodules in leguminous promote the symbiosis with micro-organisms ,  
25 which are responsible for the decomposition of the plants, and therefore constitute the key of the  
26 transmission of the stored carbon into the soil. The results indicate that cultivated leguminous grasslands  
27 sequestered more SOC with higher SOC sequestration efficiency than cultivated gramineous grasslands in

28 arid and semi-arid areas. Our results provide a reference for ecological management in arid and semi-arid  
29 areas.

30 **KEY-WORDS:** Cultivated grassland, Carbon sequestration, Gramineous, Leguminous, SOC

## 31 1 Introduction

32 ~~The s~~Soil is a key component of the Earth System and ~~it~~ contributes~~s~~ to services, goods~~s~~, and resources to the  
33 humankind (Brevik et al., 2015). Soil ~~stored~~stores more carbon (C) than the atmosphere and vegetation  
34 (Köchy et al., 2015; Keesstra et al., 2016). Soil organic carbon (SOC) as a key component of the global  
35 carbon cycle and its potential to sink from atmosphere carbon dioxide (CO<sub>2</sub>) have been widely discussed in  
36 the scientific literatures throughout the world (Guo and Gifford, 2002; Lal, 2004; De Deyn et al., 2008; Deng  
37 et al., 2014a; Parras-Alcántara et al., 2015). ~~Thus during recent decades, massive emphasis had been given in~~  
38 ~~SOC storage and sequestration on global scale.~~In the terrestrial ecosystem, SOC pool dynamics were  
39 affected by many factors, such as climate change (Lal, 2004; Field et al., 2007), management practices (Luo  
40 et al., 2010; Ono et al., 2015), land use etc. (Post et al., 2000; Don et al., 2011; Deng et al., 2014b;  
41 Muñoz-Rojas et al., 2015).

42 SOC plays an extremely important role in controlling~~of~~ soil fertility and cropping system productivity  
43 and sustainability (Hurisso et al., 2013; De Moraes Sá et al., 2015), particularly in low-productivity arid and  
44 semiarid agro-ecosystems (Behera et al., 2015). To develop farming methods that ~~conserve~~conserving SOC  
45 is therefore of a great importance (Lal, 2004). Cultivated grassland has much more advantages than natural  
46 grassland regeneration, such as accelerating vegetation restoration and improving grassland productivity.

47 Establishing artificial grassland is one type of land uses to ~~restore~~restoring vegetation and ~~improve~~  
48 improving SOC (Fu et al., 2010; Wu et al., 2010; Li et al., 2014; ~~Wu et al., 2010~~). ~~In grassland, atmosphere~~  
49 ~~carbon was sequestered through photosynthesis and respiration, then carbon fixing in stable SOC pool or~~  
50 ~~releasing back into the atmosphere (Post et al., 2000). Therefore, studying the carbon sequestration in~~  
51 ~~grassland ecosystems can help to identify the magnitude of global carbon sinks and sources (Li et al., 2014).~~

52 ~~The balance of Soil carbon pool is determined by the carbon input from leaf and root and its~~  
53 ~~mineralization in soil, and output in decomposition processes of soil organic matter by soil microbes and~~

54 ~~respiration from plant roots (Amundson, 2001; Garcia-Diaz et al., 2016). The biomass fraction resulting in~~  
55 ~~SOC build-up (plant residuals) was strongly affected by management practices including the selection of~~  
56 ~~plant species (Don et al., 2011). Species composition had a great role in determining the aboveground~~  
57 ~~productivity (Liu et al., 2016). Over relatively long time, the proportion of the aboveground biomass enters~~  
58 ~~soil as organic matter and incorporates into soil through physical and biological processes. For example,~~  
59 ~~some leachates from plant material in the litter layer, root exudates, solid decomposed litter and fragmented~~  
60 ~~plant structure materials (Jones and Donnelly, 2004; Novara et al., 2015). The amount of plant residuals~~  
61 ~~returned to the soil directly affected the SOC (Musinguzi et al., 2015; Wasak et al., 2015), and mostly~~  
62 ~~perennial plants were managed with high planting densities to produce greater biomass exports (Hobbie et al.,~~  
63 ~~2007; Köchy et al., 2015).~~

64 Vegetation degradation and exponential population growth have caused massive amounts of soil and  
65 water to be lost. The Chinese government has implemented the most ambitious ecological program titled  
66 ‘Grain-for-Green’ Project (converting degraded, marginal land and cropland into grassland, shrubland and  
67 forest), with the objective of transforming the low-yield slope cropland into grassland, reducing soil erosion,  
68 maintaining land productivity and improving environmental quality (Fu, 1989; Liu et al., 2008;). The large  
69 scale of the project indeed enhanced carbon sequestration capacity in China, especially in arid and semi-arid  
70 areas (Chang et al., 2011; Song et al., 2014).

71 Many prior studies about SOC have paid much attention to conversion from farmland to grassland,  
72 shrubland or forest (Fu et al., 2010; Deng et al., 2014a). The main dominant grass species used in the project  
73 are leguminous and gramineous (Jia et al., 2012; Wang et al., 2015). However, less attention has been  
74 devoted to the SOC among different plant species grasslands. In current study, we have focused on  
75 ascertaining the influence of leguminous and gramineous grasslands on SOC sequestration capacity and  
76 efficiency. Many studies had demonstrated that there is a significant and positive relationship on SOC and

77 nitrogen (Deng et al., 2013; Zhu et al., 2014). So we hypothesize that the leguminous grassland has the  
78 higher SOC sequestration capacity than gramineous grassland. More specifically, our objectives are: (i) to  
79 analyze the ~~effects of SOC stock and sequestration~~differences of storage efficiency under different grasslands;  
80 (ii) to determine which type of cultivated grassland might better improve SOC storage in arid and semi-arid  
81 areas.

## 82 **2 Material and methods**

### 83 **2.1 Experimental site and design**

84 The study ~~site was~~ was conducted at the Lanzhou scientific observation and experiment field station of  
85 ministry of agriculture for ecological system in the Loess Plateau area located in Gongjiawan County  
86 (103°44.342' E, 36°02.196' N, 1966-1635 m a.s.l.) of in Lanzhou, Gansu Province, China (Fig. 1). The site is  
87 the ~~semi-arid temperate~~ continental ~~temperate monsoon~~ climate zone. The data from the National  
88 Meteorological Information Center of China showed that the mean annual temperature ~~was is~~ 9.3 °C  
89 ~~(2008-2012), and the minimum and maximum values were -23.1 °C and 39.1 °C (2008-2012), respectively.~~  
90 ~~The annual cumulative temperature above 10 °C was between 1900 and 2300 °C d, and above 0 °C it was~~  
91 ~~3700 °C d. The mean annual precipitation was 324.5 mm, and which approximately 80% falls during the~~  
92 ~~growing season (from May to September).~~ The topography of study area ~~was is~~ typical characteristics of the  
93 Loess Plateau, such as plains, ridges and mounds, etc. ~~The elevation of study site was about 1700 m. Soil~~  
94 ~~parent material is the Quaternary eolian loess.~~ The main soil type ~~was is~~ Sierozem, which is a calcareous soil  
95 and characteristics of the Chinese loess region (Li et al., 2010). Sierozem is the soil developed in the dry  
96 climate and desert steppe in warm temperate zone, which has low humus and weak leaching (National soil  
97 census office, 1998). There is the patch or pseudohyphae calcium carbonate deposition and strong lime  
98 reaction within full sierozem profile (Shi, 2013). Soil total nitrogen content is about 0.41 g kg<sup>-1</sup>, total  
99 phosphorus content is 0.46 g kg<sup>-1</sup>, total potassium content is 18.24 g kg<sup>-1</sup>, and pH is 8.25 in study site.

100 The experimental site was originally under sorghum (*Sorghum bicolor* L.) continuously from 1970 to  
101 2005 and it was abandoned from 2005 to 2007 (grazing exclusion). In 2007, five cultivated grasslands, one  
102 uncultivated grassland (abandoned cropland, Un-G), one natural grassland (Na-G) were established in the  
103 study site. Five main forage grasses, widely grown across in semi-arid areas, were selected to establish five  
104 types of cultivated grassland, namely three leguminous species (*Coronilla varia* L., L-CV; *Onobrychis*  
105 *viciaefolia* Scop, L-OV; *Medicago sativa* L., L-MS) and two gramineous species (*Poa annua* L., G-PA;  
106 *Agropyron cristatum* L. Gaertn., G-AC) ~~(Table 1)~~. The seeding rates in different grassland were showed in  
107 Table 1. The different seeding rates were contributed to the percentage of germination, to guarantee the equal  
108 plant density in each grassland. The rates were determined by reference to local farmland crop density. We  
109 designed the experiment to be a randomized plot design. Three experimental plots (10 m × 20 m) were  
110 established randomly within each of the grassland areas. The forage grasses were planted in early April of  
111 2007, and all plots were weeded manually and watered three times (April, June, October) annually from  
112 2008 to 2012 to preserve the monocultures. The plots did not fertilized during cultivation. All the plots were  
113 harvested once a year in October.

## 114 **2.2 Aboveground plant and belowground biomass sampling**

115 Ten quadrats (1 m × 1 m) were randomly arranged in each plot in late August every year (2008-2012).  
116 Aboveground biomass was measured by harvesting the upper plant parts, ~~by~~ (clipping their stems at the soil  
117 surface); from ~~ten each~~ quadrats (1 m × 1 m) in each plot randomly in late August every year (2008-2012).  
118 All green aboveground plant parts in each quadrat were collected ~~separately by each individual species~~, and  
119 all the litters ~~layer~~ also were collected with the labeled envelopes. Then ~~these~~ samples were dried at 105 °C  
120 until their mass was constant, and then their mass was weighed and recorded.

121 Belowground biomasses and soil samples were taken in the four corners and the center of ~~the each~~  
122 quadrats where ~~were~~ the aboveground biomass sampling points is (Fig. 1). Belowground biomass ~~were was~~

123 collected using a soil drilling sampler with 9 cm inner diameter ~~from at~~ 0-100 cm soil layer (~~and~~ separated  
124 into increments every 10 cm). The roots in the soil samples were obtained by a 2 mm sieve. Then the  
125 remaining roots in the soil samples were isolated by shallow trays, and allowing the flowing water from the  
126 trays to pass through a 0.5 mm mesh sieve. All the roots samples were oven-dried at 65 °C then weighed.

### 127 **2.3 Soil sampling and determination**

128 The method of soil sampling is similar to belowground (using a soil drilling sampler with 4 cm inner  
129 diameter from 0-100 cm soil layer). In each quadrat, the same layer samples (every 10 cm) were mixed  
130 together ~~and be~~ composed ~~of~~ a composite sample. The samples were passed through a 2-mm sieve to  
131 remove the roots and other debris. A 5 cm diameter and 5 cm high stainless steel cutting ring (~100 cm<sup>3</sup>) was  
132 used to measure soil bulk density (BD) at adjacent points to the soil sampling ~~quadrats~~. Soil bulk density was  
133 measured at the depth of 0-100 cm (10 cm a layer then averaging). The dry mass ~~were was~~ measured after  
134 oven-drying at 105 °C. Soil organic carbon content was measured using the method of the vitriol  
135 acid-potassium dichromate oxidation (Walkley and Black, 1934). All the analyses of one sample were carried  
136 out in three replications.

### 137 **2.4 Relative calculation**

138 BD was calculated depending on the oven dried weight of the composite soil samples (Deng et al., 2013).

139 The SOC stock for each soil layer was calculated using the equation as follows (Deng et al., 2013):

$$140 C_s = BD \times SOC \times D/10 \quad (1)$$

141 where,  $C_s$  is the SOC stock (Mg ha<sup>-1</sup>); BD is the soil bulk density (g cm<sup>-3</sup>); SOC is the soil organic carbon  
142 content (g kg<sup>-1</sup>); and D is the thickness of the sampled soil layer (cm).

143 The SOC sequestration rate (SSR, Mg ha<sup>-1</sup> yr<sup>-1</sup>) was calculated as follows (Hua et al., 2014):

$$144 SSR = (C_t - C_0)/t \quad (2)$$

145 where,  $(C_t - C_0)$  is SOC sequestration;  $C_t$  is the SOC stock in 2012;  $C_0$  is the SOC stock in 2008; t was

146 the duration of experiment [\(year\)](#).

147 The SOC sequestration efficiency was estimated using the SOC sequestration in the weight of total  
148 biomass (aboveground biomass and belowground biomass) of per unit area:

$$149 \quad C_{se} = \Delta C / B_T / 10 \quad (3)$$

150 where,  $C_{se}$  is the SOC sequestration efficiency;  $\Delta C$  ( $\text{Mg ha}^{-1}$ ) is the SOC sequestration from 2008 to  
151 2012;  $B_T$  ( $\text{kg m}^{-2}$ ) is the total biomass (above ground and below ground) from 2008 to 2012.

## 152 2.5 Statistical analyses

153 The data were examined for normality by the Shapiro-Wilk test and homogeneity of variances by the Levene  
154 test before analysis [\(Table 2\)](#). To get a normal distribution, performing statistical tests not normally  
155 distributed data were log-transformed. All data were expressed as mean values  $\pm$  standard error ( $M \pm SE$ ).

156 The means of SOC sequestration rate and SOC sequestration efficiency among the different grassland types  
157 were assessed using One-way Analysis of Variance (ANOVA). Two-way ANOVA of Type III was performed  
158 to test the influences of grassland types and time on SOC content, storage and bulk density. Tukey test was  
159 conducted to test the significance at  $p < 0.05$  level. All the statistical analysis was performed with SPSS  
160 version 18.0 (SPSS Inc., Chicago, IL, USA).

## 161 3 Results

### 162 ~~3.1 Aboveground net primary productivity~~

163 Between 2008 and 2012, the five cultivated grasslands in general had greater total biomass values than the  
164 uncultivated grassland and natural grassland (mean by 189.36%). In addition, the three grasslands cultivated  
165 with the leguminous species had greater annual total biomass than ~~the~~ two gramineous grasslands (mean by  
166 72.6%), ~~which lead to a greater total biomass values of the three leguminous species at the end of the study~~  
167 ~~period. In particular, the~~ L-MS grassland consistently had the greatest total biomass throughout the study  
168 period (Fig. ~~1a~~ [2a](#)).



### 169 ~~3.2 Soil SOC content and controls~~

170 Results from two-way ANOVA showed that the plots ~~types~~, year and interactions all significantly affected  
171 total biomass, SOC content, and BD ( $p < 0.001$ , Table 53). The average SOC content followed leguminous  
172 grasslands ( $4.21 \pm 0.31 \text{ g kg}^{-1}$ ) > natural grasslands ( $2.90 \pm 0.14 \text{ g kg}^{-1}$ ) > uncultivated grassland ( $2.58 \pm 0.17$   
173  $\text{g kg}^{-1}$ ) > gramineous grassland ( $2.46 \pm 0.15 \text{ g kg}^{-1}$ ), and it increased over time in all grasslands (Table 24).  
174 ~~The L-MS grassland had the highest SOC content among the grasslands during the study period.~~ The effects  
175 of grassland types on soil bulk density followed uncultivated and natural grassland ( $1.44 \pm 0.02 \text{ g cm}^{-3}$ ) >  
176 gramineous grasslands ( $1.43 \pm 0.01 \text{ g cm}^{-3}$ ) > leguminous grasslands ( $1.40 \pm 0.01 \text{ g cm}^{-3}$ ), (Table 35).

### 177 ~~3.3 Soil organic carbon stock change~~

178 The SOC storage under all the grasslands increased significantly throughout the study period (Table 46),  
179 ~~with the three cultivated leguminous grasslands further significantly greater than those under the two~~  
180 ~~gramineous grasslands. To be specific, in In~~ the 0-20 cm soil layer, the SOC storage under the L-MS, L-CV  
181 and L-OV grasslands increased ~~from 9.73, 5.20, 7.27 Mg C ha<sup>-1</sup> to 14.95, 13.54, 12.05~~ by 5.22, 8.34 and 4.78  
182 Mg C ha<sup>-1</sup>, respectively, during the experimental period.

### 183 ~~3.4 Soil carbon sequestration rate and sequestration efficiency~~

184 ~~SOC sequestrations in three leguminous grasslands were greater than two gramineous grasslands (mean~~  
185 ~~by 196.74%; Fig. 1e).~~ Three leguminous grasslands accumulated C with an average rate 1.00 Mg C ha<sup>-1</sup> yr<sup>-1</sup>  
186 which is more than the 0.34 Mg C ha<sup>-1</sup> yr<sup>-1</sup> in gramineous grassland, and more than the average of  
187 uncultivated and natural grasslands (0.25 Mg C ha<sup>-1</sup> yr<sup>-1</sup>; Fig. 2c).

188 ~~The mean SOC sequestration efficiency in the leguminous grassland was about 0.26, which was~~  
189 ~~significantly greater than others grassland types (0.13;  $p < 0.05$ ; Fig. 1d2d).~~ ~~The maximum and minimum~~  
190 ~~efficiency values were 0.37, 0.08 in L-CV, G-PA grassland, respectively. The average SOC sequestration~~  
191 ~~efficiency in leguminous grassland was two times greater than gramineous grassland.~~

## 192 4 Discussion

193 Grassland has a significant effect in arid and semi-arid areas carbon cycle through changing soil carbon  
194 accumulation rates and turnover, soil erosion, and vegetation biomass (Deng et al.,2014a; Liu et al., 2016a).  
195 Plant regulated SOC stock by controlling carbon assimilation, transfer and storage in the plant root system,  
196 then through plant respiration and leaching release from soil to atmosphere(De Deyn et al., 2008;  
197 Garcia-Diaz et al., 2016). SOC inputs mostly originate from decaying aboveground and belowground plant  
198 tissue, so greater soil C accumulation was mainly ascribed to increasing soil C input from higher biomass  
199 production (Deng et al., 2014c; Wu et al., 2016). Mutualistic symbionts (N-fixing bacteria and mycorrhizal  
200 fungi) are also an important source of carbon input to soil, especially in actively growing plants (Bardgett et  
201 al., 2005). In grassland, atmosphere carbon ~~was is~~ sequestered through photosynthesis and respiration, then  
202 carbon ~~fixing fixes~~ in stable SOC pool or ~~releasing-release~~ back into the atmosphere (Post et al., 2000).

203 Therefore, studying the carbon sequestration in grassland ecosystems can help to identify the magnitude of  
204 global carbon sinks and sources (Li et al., 2014). Our results showed that leguminous grassland had greater  
205 SOC content and storage efficiency than gramineous grassland. SOC content of all grassland plots showed  
206 some differences between each other (Table 2 and 3). The average SOC content in leguminous grasslands  
207 was 2.64 g kg<sup>-1</sup> and that in gramineous grasslands was 1.97 g kg<sup>-1</sup>. Moreover, both soil bulk density of  
208 leguminous and gramineous grasslands were 1.46 g cm<sup>-3</sup> in 2008. The reasons for the SOC content difference  
209 result from precedent soil conditions and cultivated grasses. The ~~D~~difference~~cet~~ types of cultivated grasses, as  
210 well as the precedent soil conditions are is probably the majortwo reasons for the SOC content differences  
211 between leguminous and gramineous grasslands.

212 Different species may incorporate more or less carbon according to their specific metabolism. Legumes  
213 have been identified as a key driver of C sequestration in many studies (Fornara and Tilman, 2008; Wu et al.,  
214 2016). The irregular distribution of precedent plant residues and roots resulted in the patch of nutrients in the

215 soil and changing the soil physical conditions, such as SOC and BD. In addition, mutualistic symbionts  
216 (N fixing bacteria and mycorrhizal fungi) are also an important source of carbon input to soil, especially in  
217 actively growing plants (Bardgett et al., 2005). Symbiosis can increase plant productivity through enhanced  
218 the acquisition of limited resources. Legumes live in a symbiosis with *Rhizobium* bacteria, which fix  
219 atmospheric N. Moreover, many previous studies had demonstrated that soil carbon and total nitrogen are  
220 significantly and positively correlated (Deng et al., 2013; De Oliveira et al., 2015). Therefore, mycorrhizal  
221 fungi can immobilize carbon in their mycelium and improve carbon sequestration in soil aggregates (Rillig  
222 and Mummey, 2006). It might be expected that the cultivated leguminous grasslands significantly improved  
223 soil N content that led to the greater carbon sequestration ability than the non-leguminous grasslands.  
224 Moreover, mycorrhizal fungi can immobilize carbon in their mycelium and improve carbon sequestration in  
225 soil aggregates (Rillig and Mummey, 2006). Our results demonstrated that a key variable associated with  
226 higher SOC content in leguminous grasslands than gramineous grasslands is the greater total biomass  
227 accumulation. The leguminous grasslands had both higher above and belowground biomasses than  
228 gramineous grasslands. Total biomass was  $16.35 \text{ kg m}^{-2}$  in leguminous grasslands, which is  $9.47 \text{ kg m}^{-2}$  more  
229 than gramineous grasslands from 2008 to 2012. In addition, the grasslands in our study without grazing and  
230 only harvesting the aboveground biomass annually, so all the aboveground stubble and plant litters be input  
231 to soil as a carbon supply. SOC mostly originates from decaying this aboveground and belowground plant  
232 tissue, so greater soil C accumulation was mainly ascribed to increasing soil C input from higher biomass  
233 production (Deng et al., 2014c; Wu et al., 2016). Previous studies had showed that plant regulated SOC stock  
234 by controlling carbon assimilation, its transfer and storage in plant root system, then through plant respiration  
235 and leaching its release from soil to atmosphere (De Deyn et al., 2008). In addition, the biomass fraction  
236 resulting in SOC build-up (plant residuals) was strongly affected by management practices including the  
237 selection of plant species (Don et al., 2011). Species composition had a great role in determining the

238 aboveground productivity (Liu et al., 2016b). Over relatively long time, the proportion of the aboveground  
239 biomass enters soil as organic matter and incorporates into soil through physical and biological processes.  
240 Some leachates from plant material in the litter layer, root exudates, solid decomposed litter and fragmented  
241 plant structure materials were the main sources of soil organic matter (Jones and Donnelly, 2004; Novara et  
242 al., 2015). The amount of plant residuals returned to the soil directly affected the SOC (Musinguzi et al.,  
243 2015; Wasak et al., 2015), and mostly perennial plants were managed with high planting densities to produce  
244 greater biomass exports (Hobbie et al., 2007; Köchy et al., 2015). Deng et al. (2014c) have found that plant  
245 biomass is the key driver in soil carbon sequestration. In this study, the SOC increased dramatically in  
246 leguminous grassland due to the greater total biomasses of the leguminous grasses, which resulting in and  
247 increased-increasing soil carbon inputs from the litter layer and root biomass (De Deyn et al., 2008; Wu et al.,  
248 2010; Novara et al., 2015). Moreover, Symbiosis can increase plant productivity through enhancing the  
249 acquisition of limited resources. Our results demonstrated that a key variable associated with higher SOC  
250 content in leguminous grasslands than gramineous grasslands is the greater total biomass accumulation. The  
251 leguminous grasslands had both higher above- and belowground biomasses than gramineous grasslands.  
252 Total biomass was 16.35 kg m<sup>-2</sup> in leguminous grasslands, which are 9.47 kg m<sup>-2</sup> more than gramineous  
253 grasslands from 2008 to 2012. In addition, the grasslands in our study without grazing and only harvested the  
254 aboveground biomass annually, so all the aboveground stubble and plant litters input to soil as a carbon  
255 supply.

256 SOC sequestration rates in the ~~cultivated~~ leguminous grasslands were significantly higher than that in the  
257 gramineous grasslands (Fig. 1c). This maybe resulted from SOC sequestration and the different  
258 decomposition rates in soils, because the ~~cultivated~~ leguminous and gramineous grass species result in  
259 multifarious nutrient conditions. ~~The slower rates of decomposition might make soil carbon storages-~~  
260 ~~increased faster in more nutrient poor soils (Vesterda et al., 2002; Deng et al., 2014a). L-CV grassland has-~~

261 ~~the highest SOC sequestration rate and efficiency but with the lowest total biomass among the leguminous~~  
262 ~~grasslands. The reasons maybe the different species with the various C sequestrate capability, but the~~  
263 ~~potential mechanism under each species need further studies to demonstrate. Leguminous grasslands~~  
264 ~~achieved greater SOC sequestration rates due to the total biomass was higher than that in the gramineous~~  
265 ~~grasslands. Litter and fragmented plant parts at the soil surface are decomposed by micro-organisms and are~~  
266 gradually incorporated into the soil through some complex processes, such as humification and  
267 mineralization (Novara et al., 2015). Legumes had the ability to develop root nodules and to fix nitrogen in  
268 symbiosis with compatible rhizobia, which should improve the soil nutrient status and microbial community.  
269 In addition to this, rates of decomposition in leguminous grassland may be higher due to excellent soil  
270 physical and chemical conditions. Root nodules promote the symbiosis with micro-organisms, which are  
271 responsible for the decomposition of the plants, and therefore constitute the key of the transmission of the  
272 stored carbon into the soil. Moreover, many previous studies had demonstrated that soil carbon and total  
273 nitrogen are significantly and positively correlated (Deng et al., 2013; De Oliveira et al., 2015). Therefore, it  
274 might be expected that the cultivated leguminous grasslands had significantly improved soil N contents that  
275 led to a greater carbon sequestration ability than the non leguminous grasslands. Furthermore, the resulting  
276 increase-increasing in fertility of the soils in under the leguminous grasses should facilitate the increased-  
277 increasing productivity of the plants. Our results showed that SOC sequestration efficiency under leguminous  
278 grasslands was evidently greater than that in the gramineous grasslands (Fig. 1d). It is noteworthy that L-MS  
279 grassland had the highest total biomass 22.59 kg m<sup>-2</sup> which is 2.38 times as much as the average of  
280 gramineous grasslands (Fig. 1a2a), ~~).~~ Moreover, SOC sequestration in L-MS grassland is 3 times as much  
281 as the average of gramineous grasslands (Fig. 1b2b). The differences of species biological characteristics  
282 determine the capacity of carbon sequestration. So the SOC sequestration efficiency in L-MS grassland is  
283 higher than gramineous grasslands.

284 Despite the indications from this study of higher SOC sequestration rate and efficiency in leguminous  
285 grassland, specific researches are still needed to determine the potential mechanisms of each species in  
286 sequestering carbon. Many studies have been demonstrated legumes are higher water consuming plants than  
287 gramineous in arid and semi-arid areas, so it is necessary to balance the ecological effect of grassland for  
288 rational utilization of resources.

## 289 **5 Conclusion**

290 Leguminous grasslands had greater SOC storage, sequestration rate and efficiency than gramineous  
291 grasslands. The greater soil C accumulation of leguminous grasslands was mainly ascribed to the capacity to  
292 incorporate carbon and the higher biomass production. Leguminous grasslands accumulated an average rate  
293 of 0.64 Mg C·ha<sup>-1</sup>·yr<sup>-1</sup> more than gramineous grasslands. The average SOC sequestration efficiency in  
294 leguminous grasslands was 2 times greater than that in the gramineous grasslands. ~~The~~Our results indicate  
295 that cultivated leguminous grasslands sequestered more soil carbon with a higher SOC sequestration  
296 efficiency than cultivated gramineous grasslands in arid and semi-arid areas. Our results provide a reference  
297 for ecological management in arid and semi-arid areas.

## 299 **6 Acknowledgement**

300 We thank the editor for suggestions on this manuscript. This research was funded by the National Natural  
301 Science Foundation of China (~~41371282~~, 41525003, 31372368, ~~41371282~~, and 41303062), the Youth  
302 Innovation Promotion Association CAS (2011288), the “Light of West China” Program of CAS  
303 (XAB2015A04), Lanzhou Institute of Animal and Veterinary Pharmaceutics Sciences of Chinese Academy  
304 of Agricultural Sciences (CAAS-ASTIP-2014-LIHPS-08).

## 305 **References**

306 ~~Amundson, R.: The carbon budget in soils, Ann. Rev. Earth. Planetary Sci., 29, 535-562, doi:-~~

307 ~~10.1146/annurev.earth.29.1.535, 2001.~~

308 Bardgett, R. D., Bowman, W. D., Kaufmann, R., and Schmidt, S. K.: A temporal approach to linking  
309 aboveground and belowground ecology, *Trends Ecol. Evol.*, 20, 634-641, doi: 10.1016/j.tree.2005.08.005,  
310 2005.

311 Behera, S. K., Shukla, A. K.: Spatial distribution of surface soil acidity, electrical conductivity, soil organic  
312 carbon content and exchangeable potassium, calcium and magnesium in some cropped acid soils of India,  
313 *Land Degrad. Devel.*, 26, 71-79, doi: 10.1002/ldr.2306, 2015.

314 Brevik, E. C., Cerdà A., Mataix-Solera, J., Pereg, L., Quinton, J.N., Six, J., and Van Oost, K.: The  
315 interdisciplinary nature of SOIL, *SOIL*, 1, 117-129, doi: 10.5194/soil-1-117-2015, 2015.

316 Chang, R. Y., Fu, B. J., Liu, G. H., and Liu, S. G.: Soil carbon sequestration potential for 'Grain for Green'  
317 Project in Loess Plateau, China, *Environ. Manage.*, 48, 1158-1172, doi: 10.1007/s00267-011-9682-8,  
318 2011.

319 De Deyn, G. B., Cornelissen, J. H., and Bardgett, R. D.: Plant functional traits and soil carbon sequestration  
320 in contrasting biomes, *Ecol. Lett.*, 11, 516-531, doi: 10.1111/j.1461-0248.2008.01164.x, 2008.

321 De Moraes Sá Jã C., Séguy, L., Tivet, F., Lal, R., Bouzinac, S., Borszowskei, P. R é, Briedis, C., Dos Santos,  
322 J. B., Da Cruz Hartman, D., Bertoloni, C. G., Rosa, J., and Friedrich, T.: Carbon depletion by plowing and  
323 its restoration by no-till cropping systems in oxisols of subtropical and tropical agro-ecoregions in Brazil,  
324 *Land Degrad. Develop.*, 26, 531-543, doi: 10.1002/ldr.2218, 2015.

325 Deng, L., Liu, G. B., and Shangguan, Z. P.: Land-use conversion and changing soil carbon stocks in China's  
326 'Grain-for-Green' Program: a synthesis. *Global Change Biol.*, 20, 3544-3556, doi: 10.1111/gcb.12508,  
327 2014a.

328 Deng, L., Shangguan, Z. P., and Sweeney, S.: Changes in soil carbon and nitrogen following land  
329 abandonment of farmland on the Loess Plateau, China, *PLoS ONE*, 8, e71923, doi:

330 10.1371/journal.pone.0071923, 2013.

331 Deng, L., Shangguan, Z. P., and Sweeney, S.: ‘Grain-for-Green’ driven land use change and carbon  
332 sequestration on the Loess Plateau, China, *Sci. Rep.*, 24, 414-422, doi: 10.1038/srep07039, 2014b.

333 Deng, L., Wang, K. B., Li, J. P., Shangguan, Z. P., and Sweeney, S.: Carbon storage dynamics in alfalfa  
334 (*Medicago sativa*) fields on the Loess Plateau, China, *CLEAN-Soil, Air, Water*, 42, 1253-1262, doi:  
335 10.1002/clen.201300079, 2014c.

336 De Oliveira, S. P., De Lacerda, N. B., Blum, S. C., Escobar, M. E. O., De Oliveira, T. S.: Organic carbon and  
337 nitrogen stocks in soils of northeastern Brazil converted to irrigated agriculture, *Land Degrad. Develop.*,  
338 26, 9-21, doi: 10.1002/ldr.2264, 2015.

339 Don, A., Schumacher, J., and Freibauer, A.: Impact of tropical land-use change on soil organic carbon stocks  
340 - a meta-analysis, *Global Change Biol.*, 17, 1658-1670, doi: 10.1111/j.1365-2486.2010.02336.x, 2011.

341 Field, C. B., Lobell, D. B., Peters, H. A., and Chiariello, N. R.: Feedbacks of terrestrial ecosystems to climate  
342 change, *Annu. Rev. Env. Resour.*, 32, 1-29, doi: 10.1146/annurev.energy.32.053006.141119, 2007.

343 [Fornara, D. A., Tilman, D.: Plant functional composition influences rates of soil carbon and nitrogen](#)  
344 [accumulation, \*J. Ecol.\*, 96, 314-322, doi: 10.1111/j.1365-2745.2007.01345.x.](#)

345 Fu, B. J.: Soil erosion and its control in the Loess Plateau of China, *Soil Use Manage.*, 5, 76-81, doi:  
346 10.1111/j.1475-2743.1989.tb00765.x, 1989.

347 Fu, X. L., Shao, M. A., Wei, X. R., and Horton R.: Soil organic carbon and total nitrogen as affected by  
348 vegetation types in northern Loess Plateau of China, *Geoderma*, 155, 31-35, doi:  
349 10.1016/j.geoderma.2009.11.020, 2010.

350 Garcia-Diaz, A., Bienes-Allas, R., Gristina, L., Cerdà A., Novara, A., and Pereira, P.: Carbon input threshold  
351 for soil carbon budget optimization in eroding vineyards, *Geoderma*, 271, 144-149,  
352 doi:10.1016/j.geoderma.2016.02.020, 2016.



353 Guo, L. B., and Gifford, R. M.: Soil carbon stocks and land use change. *Global Change Biol.*, 8, 345-360, doi:  
354 10.1046/j.1354-1013.2002.00486.x, 2002.

355 Hobbie, S. E., Ogdahl, M., Chorover, J., Chadwick, O. A., Oleksyn, J., Zytkowskiak, R., and Reich, P. B.: Tree  
356 species effects on soil organic matter dynamics: the role of soil cation composition, *Ecosystems*, 10,  
357 999-1018, doi: 10.1007/s10021-007-9073-4, 2007.

358 Hua, K. K., Wang, D. Z., Guo, X. S., and Guo, Z. B.: Carbon sequestration efficiency of organic amendments  
359 in a long-term experiment on a vertisol in Huang-Huai-Hai Plain, China, *PloS ONE*, 9, e108594, doi:  
360 10.1371/journal.pone.0108594, 2014.

361 Hurisso, T. T., Norton, J. B., and Norton, U.: Soil profile carbon and nitrogen in prairie, perennial  
362 grass-legume mixture and wheat-fallow production in the central High Plains, USA, *Agr. Ecosyst.*  
363 *Environ.*, 181, 179-187, doi: 10.1016/j.agee.2013.10.008, 2013.

364 Jia, X. X., Wei, X. R., Shao, M. A., and Li, X. Z.: Distribution of soil carbon and nitrogen along a  
365 revegetational succession on the Loess Plateau of China, *Catena*, 95, 160-168, doi:  
366 10.1016/j.catena.2012.02.018, 2012.

367 Jones, M. B., and Donnelly, A.: Carbon sequestration in temperate grassland ecosystems and the influence of  
368 management, climate and elevated CO<sub>2</sub>, *New Phytol.*, 164, 423-439, doi:  
369 10.1111/j.1469-8137.2004.01201.x, 2004.

370 Keesstra, S. D., Bouma, J., Wallinga, J., Tuttonell, P., Smith, P., Cerdà A., Montanarella, L., Quinton, J. N.,  
371 Pachepsky, Y., van der Putten, W. H., Bardgett, R. D., Moolenaar, S., Mol, G., Jansen, B., Fresco, L. O.:  
372 The significance of soils and soil science towards realization of the United Nations Sustainable  
373 development goals, *SOIL*, 2, 111–128, doi: 10.5194/soil-2-111-2016, 2016.

374 Köchy, M., Hiederer, R., and Freibauer, A.: Global distribution of soil organic carbon-Part 1: Masses and  
375 frequency distributions of SOC stocks for the tropics, permafrost regions, wetlands, and the world, *SOIL*,

376 1, 351-365, doi: 10.5194/soil-1-351-2015, 2015.

377 Köchy, M., Don, A., van der Molen, M. K., and Freibauer, A.: Global distribution of soil organic carbon-Part  
378 2: Certainty of changes related to land use and climate, SOIL, 1, 367-380, doi: 10.5194/soil-1-367-2015,  
379 2015.

380 Lal, R. Soil carbon sequestration to mitigate climate change, Geoderma, 123, 1-22, doi:  
381 10.1016/j.geoderma.2004.01.032, 2004.

382 Li, X. D., Fu, H., Guo, D., Li, X. D., and Wan, C. G.: Partitioning soil respiration and assessing the carbon  
383 balance in a *Setaria italica* (L.) Beauv. Cropland on the Loess Plateau, Northern China, Soil Biol.  
384 Biochem., 42, 337-346, doi: 10.1016/j.soilbio.2009.11.013, 2010.

385 Li, Y. Y., Dong, S. K., Wen, L., Wang, X. X., and Wu, Y.: Soil carbon and nitrogen pools and their  
386 relationship to plant and soil dynamics of degraded and artificially restored grasslands of the  
387 Qinghai-Tibetan Plateau, Geoderma, 213, 178-184, doi: 10.1016/j.geoderma.2013.08.022, 2014.

388 Liu, J. G., Li, S. X., Ouyang, Z. Y., Tam, C., and Chen, X. D.: Ecological and socioeconomic effects of  
389 China's policies for ecosystem services. P. Nat. Acad. Sci. USA, 105, 9477-9482, doi:  
390 10.1073/pnas.0706436105, 2008..

391 [Liu, Y., Dang, Z.Q., Tian, F.P., Wang, D., and Wu, G.L.: Soil organic carbon and inorganic carbon](#)  
392 [accumulation along a 30-year grassland restoration chronosequence in semi-arid regions \(China\). Land](#)  
393 [Degrad. Develop., doi: 10.1002/ldr.2632, 2016a.](#)

394 Liu, Y., Wu, G. L., Ding, L. M., Tian, F. P., [and](#) Shi, Z. H.: Diversity–Productivity Trade-off During  
395 Converting Cropland to Perennial Grassland in the Semi-arid Areas of China, Land Degrad. Develop., doi:  
396 10.1002/ldr.2561, 2016**b**.

397 Luo, Z. K., Wang, E. L., and Sun, Q. J.: Soil carbon change and its response to agricultural practices in  
398 Australian agro-ecosystems: a review and synthesis, Geoderma, 155, 211-223, doi:

399 10.1016/j.geoderma.2009.12.012, 2010.

400 Muñoz-Rojas, M., Jordán, A., Zavala, L. M., De la Rosa, D., Abd-Elmabod, S. K., and Anaya-Romero, M.:  
401 Impact of land use and land cover changes on organic carbon stocks in mediterranean soils (1956-2007),  
402 Land Degrad. Develop., 26, 168-179, doi: 10.1002/ldr.2194, 2015.

403 Musinguzi, P., Ebanyat, P., Tenywa, J. S., Basamba, T. A., Tenywa, M. M., and Mubiru, D.: Precision of  
404 farmer-based fertility ratings and soil organic carbon for crop production on a Ferralsol, Solid Earth, 6,  
405 1063-1073, doi: 10.5194/se-6-1063-2015, 2015.

406 National soil census office: Soil in China. China agriculture press: Beijing (In Chinese) pp: 56-434. 1998.

407 Novara, A., Rühl, J., La Mantia, T., Gristina, L., La, Bella, S., and Tuttolomondo, T.: Litter contribution to  
408 soilorganic carbon in the processes of agriculture abandon, Solid Earth, 6, 425-432, doi:  
409 10.5194/se-6-425-2015, 2015.

410 Ono, K., Mano, M., Han, G.H., Nagai, H., Yamada, T., Kobayashi, Y., Miyata, A., Inoue, Y., and Lal, R.:  
411 Environmental controls on fallow carbon dioxide flux in a single-crop rice paddy, Japan, Land Degrad.  
412 Develop., 26, 331-339, doi: 10.1002/ldr.2211, 2015.

413 Parras-Alcántara, L., Dáz-Jaimes, L., and Lozano-García, B. Management effects on soil organic carbon  
414 stock in mediterranean open rangelands-treeless grasslands, Land Degrad. Develop., 26, 22-34, doi:  
415 10.1002/ldr.2269, 2015.

416 Post, W. M., and Kwon, K. C.: Soil carbon sequestration and land-use change: processes and potential. Global  
417 Change Biol., 6, 317-327, doi: 10.1046/j.1365-2486.2000.00308.x, 2000.

418 Rillig, M. C., and Mummey, D. L.: Mycorrhizas and soil structure, New Phytol., 171, 41-53, doi:  
419 10.1111/j.1469-8137.2006.01750.x, 2006.

420 Shi, R., Yang, X., Zhang, H., and Wang, L.. Vertical differentiation analysis of sierozem profile  
421 characteristics in Yili-River valley, China, Afr. J. Agr. Res., 8, 6509-6517, doi: 10.5897/AJAR12.498,

422 2013.

423 Song, X. Z., Peng, C. H., Zhou, G. M., Jiang, H., and Wang, W. F.: Chinese Grain for Green program led to  
424 highly increased soil organic carbon levels: A meta-analysis, *Sci. Rep.*, 4, 4460, doi: 10.1038/srep04460,  
425 2014.

426 Walkley, A., and Black, I. A.: An examination of the Degtjareff method for determining soil organic matter,  
427 and a proposed modification of the chromic acid titration method, *Soil Sci.*, 37, 29-38, doi:  
428 10.1097/00010694-193401000-00003, 1934.

429 Wang, Y. Q., Shao, M. A., Zhang, C. C., Han, X. W., Mao, T. X., and Jia, X. X.: Choosing an optimal  
430 land-use pattern for restoring eco-environments in a semiarid region of the Chinese Loess Plateau. *Ecol.*  
431 *Eng.*, 74, 213-222, doi: 10.1016/j.ecoleng.2014.10.001, 2015.

432 Wasak, K., and Drewnik, M.: Land use effects on soil organic carbon sequestration in calcareous Leptosols  
433 in former pastureland-a case study from the Tatra Mountains (Poland), *Solid Earth*, 6, 1103-1115, doi: 10.  
434 5194/se-6-1103-2015, 2015.

435 Wu, G. L., Liu, Y., Tian, F. P., Shi, Z. H.: Legumes functional group promotes soil organic carbon and  
436 nitrogen storage by increasing plant diversity, *Land Degrad. Develop.*, doi: 10.1002/ldr.2570, 2016.

437 Wu, G. L., Liu, Z. H., Zhang, L., Cheng, J. M., Hu, T. M.: Long-term fencing improved soil properties and  
438 soil organic carbon storage in an alpine swamp meadow of western China, *Plant Soil*, 332, 331-337, doi:  
439 10.1007/s11104-010-0299-0, 2010.

440 Zhu, H. H., Wu, J. S., Guo, S. L., Huang, D. Y., Zhu, Q. H., Ge, T. D., and Lei, T. W.: Land use and  
441 topographic position control soil organic C and N accumulation in eroded hilly watershed of the Loess  
442 Plateau, *Catena*, 120, 64-72, doi: 10.1016/j.catena.2014.04.007, 2014.

443

444 **Table 1.** Description of studied grassland types.

| Grassland types        | Species                                                                                                                                                                            | Seeding rates (kg <sub>-</sub> ha <sup>-1</sup> ) |
|------------------------|------------------------------------------------------------------------------------------------------------------------------------------------------------------------------------|---------------------------------------------------|
| Leguminous grassland   | <i>Coronilla varia</i> L.                                                                                                                                                          | 7.5                                               |
|                        | <i>Onobrychis viciaefolia</i> Scop.                                                                                                                                                | 30                                                |
|                        | <i>Medicago sativa</i> L.                                                                                                                                                          | 12                                                |
| Gramineous grassland   | <i>Poa annua</i> L.                                                                                                                                                                | 7.5                                               |
|                        | <i>Agropyron cristatum</i> (L.) Gaertn.                                                                                                                                            | 15                                                |
| Uncultivated grassland | Abandoned cropland. Natural successional species were present, e.g., <i>Chenopodium album</i> L., <i>Agropyron cristatum</i> L.                                                    |                                                   |
| Natural grassland      | A local native grassland community. Dominant species were <i>Stipa breviflora</i> Griseb., <i>Stipa aliena</i> Keng, <i>Artemisia capillaris</i> Thunb., <i>Artemisia annua</i> L. |                                                   |

445

446

**Table 3** The  $p$  values of homogeneity of variances by the Levene test and normality by the Shapiro-Wilk test

447

in soil organic carbon content (SOC), soil C storage, and soil bulk density (BD).

| <u>Grassland types</u> | <u>Levene test</u> |             |                    | <u>Shapiro-Wilk test</u> |             |                    |
|------------------------|--------------------|-------------|--------------------|--------------------------|-------------|--------------------|
|                        | <u>BD</u>          | <u>SOC</u>  | <u>SOC storage</u> | <u>BD</u>                | <u>SOC</u>  | <u>SOC storage</u> |
| <u>L-MS</u>            | <u>0.05</u>        | <u>0.27</u> | <u>0.54</u>        | <u>0.07</u>              | <u>0.12</u> | <u>0.15</u>        |
| <u>L-OV</u>            | <u>0.18</u>        | <u>0.03</u> | <u>0.04</u>        | <u>0.19</u>              | <u>0.32</u> | <u>0.36</u>        |
| <u>L-CV</u>            | <u>0.17</u>        | <u>0.84</u> | <u>0.10</u>        | <u>0.53</u>              | <u>0.18</u> | <u>0.18</u>        |
| <u>G-PA</u>            | <u>0.12</u>        | <u>0.10</u> | <u>0.01</u>        | <u>0.07</u>              | <u>0.03</u> | <u>0.02</u>        |
| <u>G-AC</u>            | <u>0.02</u>        | <u>0.09</u> | <u>0.26</u>        | <u>0.09</u>              | <u>0.17</u> | <u>0.22</u>        |
| <u>Un-G</u>            | <u>0.01</u>        | <u>0.10</u> | <u>0.06</u>        | <u>0.03</u>              | <u>0.05</u> | <u>0.03</u>        |
| <u>Na-G</u>            | <u>0.78</u>        | <u>0.27</u> | <u>0.37</u>        | <u>0.03</u>              | <u>0.31</u> | <u>0.44</u>        |

448

449 **Table 3** Two-way ANOVA F and *p* values for the effects of plot types, year, and interactions on total biomass  
 450 (TB), soil organic carbon content (SOC), soil C storage, and soil bulk density (BD). Bold numbers indicate  
 451 statistical significance.

| <u><b>Factor</b></u>          | <u><b>df</b></u> | <u><b>TB</b></u>     |                         | <u><b>SOC</b></u>   |                         | <u><b>C storage</b></u> |                         | <u><b>BD</b></u>    |                         |
|-------------------------------|------------------|----------------------|-------------------------|---------------------|-------------------------|-------------------------|-------------------------|---------------------|-------------------------|
|                               |                  | <u><b>F</b></u>      | <u><b><i>p</i></b></u>  | <u><b>F</b></u>     | <u><b><i>p</i></b></u>  | <u><b>F</b></u>         | <u><b><i>p</i></b></u>  | <u><b>F</b></u>     | <u><b><i>p</i></b></u>  |
| <u><b>Grassland types</b></u> | <u><b>6</b></u>  | <u><b>296.19</b></u> | <u><b>&lt;0.001</b></u> | <u><b>40.52</b></u> | <u><b>&lt;0.001</b></u> | <u><b>42.03</b></u>     | <u><b>&lt;0.001</b></u> | <u><b>42.48</b></u> | <u><b>&lt;0.001</b></u> |
| <u><b>Year</b></u>            | <u><b>4</b></u>  | <u><b>100.67</b></u> | <u><b>&lt;0.001</b></u> | <u><b>49.37</b></u> | <u><b>&lt;0.001</b></u> | <u><b>41.05</b></u>     | <u><b>&lt;0.001</b></u> | <u><b>7.24</b></u>  | <u><b>&lt;0.001</b></u> |
| <u><b>interaction</b></u>     | <u><b>24</b></u> | <u><b>32.57</b></u>  | <u><b>&lt;0.001</b></u> | <u><b>2.30</b></u>  | <u><b>0.001</b></u>     | <u><b>2.00</b></u>      | <u><b>0.001</b></u>     | <u><b>7.36</b></u>  | <u><b>&lt;0.001</b></u> |

452

453

454 **Table 24.** Soil C concentration ( $M \pm SE \text{ g kg}^{-1}$ , average value of 100 cm soil depth) in different years and  
 455 grassland types. Note: The grassland types were: L-Cv, *Coronilla varia*; L-Ov, *Onobrychis viciaefolia*; L-Ms,  
 456 *Medicago sativa*; G-Pa, *Poa annua*; G-Ac, *Agropyron cristatum*; Un-G, uncultivated grassland; Na-G, natural  
 457 grassland. Values followed by different lower-case letters within columns and upper-case letters within rows  
 458 are significantly different at  $p < 0.05$ .

| Grassland types | 2008               | 2009              | 2010               | 2011              | 2012              |
|-----------------|--------------------|-------------------|--------------------|-------------------|-------------------|
| L-CV            | 2.31 $\pm$ 0.04dE  | 3.09 $\pm$ 0.05cD | 4.22 $\pm$ 0.04bC  | 4.91 $\pm$ 0.02bB | 5.92 $\pm$ 0.05bA |
| L-OV            | 2.70 $\pm$ 0.04bE  | 3.33 $\pm$ 0.02bD | 3.96 $\pm$ 0.02cC  | 4.69 $\pm$ 0.08cB | 5.44 $\pm$ 0.12cA |
| L-MS            | 2.92 $\pm$ 0.06aE  | 3.62 $\pm$ 0.05aD | 4.38 $\pm$ 0.02aC  | 5.55 $\pm$ 0.09aB | 6.13 $\pm$ 0.05aA |
| G-AC            | 1.90 $\pm$ 0.01gE  | 2.13 $\pm$ 0.03fD | 2.56 $\pm$ 0.04eC  | 2.94 $\pm$ 0.03eB | 3.46 $\pm$ 0.06dA |
| G-PA            | 2.03 $\pm$ 0.01fE  | 2.14 $\pm$ 0.02fD | 2.26 $\pm$ 0.02fC  | 2.57 $\pm$ 0.01fB | 2.65 $\pm$ 0.02fA |
| Un-G            | 2.20 $\pm$ 0.08eCD | 2.35 $\pm$ 0.02eC | 2.42 $\pm$ 0.04efC | 2.81 $\pm$ 0.01eB | 3.16 $\pm$ 0.02eA |
| Na-G            | 2.53 $\pm$ 0.08cB  | 2.71 $\pm$ 0.10dB | 2.80 $\pm$ 0.12dB  | 3.18 $\pm$ 0.13dA | 3.26 $\pm$ 0.06eA |

459

460

461



462 **Table 35.** Soil bulk density ( $M \pm SE \text{ g cm}^{-3}$ , average value of 100 cm soil depth) in different years and  
 463 grassland types. Note: The grassland types were: L-Cv, *Coronilla varia*; L-Ov, *Onobrychis viciaefolia*; L-Ms,  
 464 *Medicago sativa*; G-Pa, *Poa annua*; G-Ac, *Agropyron cristatum*; Un-G, uncultivated grassland; Na-G, natural  
 465 grassland. Values followed by different lower-case letters within columns and upper-case letters within rows  
 466 are significantly different at  $p < 0.05$ .

| Grassland types | 2008           | 2009          | 2010            | 2011            | 2012          |
|-----------------|----------------|---------------|-----------------|-----------------|---------------|
| L-CV            | 1.41 ± 0.01dAB | 1.42 ± 0.01bA | 1.39 ± 0.01cB   | 1.37 ± 0.01cdC  | 1.35 ± 0.01dD |
| L-OV            | 1.51 ± 0.01aA  | 1.46 ± 0.01aB | 1.40 ± 0.01bcdC | 1.36 ± 0.01dD   | 1.33 ± 0.01eE |
| L-MS            | 1.47 ± 0.15bcA | 1.47 ± 0.01aA | 1.43 ± 0.02abAB | 1.39 ± 0.02bcBC | 1.36 ± 0.01cC |
| G-AC            | 1.45 ± 0.01cA  | 1.46 ± 0.02aA | 1.46 ± 0.01aA   | 1.45 ± 0.01aA   | 1.39 ± 0.01bB |
| G-PA            | 1.47 ± 0.01bcA | 1.46 ± 0.01aA | 1.39 ± 0.01cB   | 1.38 ± 0.01cdC  | 1.34 ± 0.01eD |
| Un-G            | 1.48 ± 0.01bA  | 1.47 ± 0.01aB | 1.43 ± 0.01abC  | 1.42 ± 0.01bD   | 1.40 ± 0.01aE |
| Na-G            | 1.49 ± 0.01abA | 1.48 ± 0.01aB | 1.42 ± 0.01bcC  | 1.42 ± 0.01bcdD | 1.41 ± 0.01aD |

467

468

469

470 **Table 46.** SOC stock ( $M \pm SE \text{ Mg C ha}^{-1}$ ) at the depth of 0-100 cm in different years and grassland types.  
 471 Note: The grassland types were: L-Cv, *Coronilla varia*; L-Ov, *Onobrychis viciaefolia*; L-Ms, *Medicago*  
 472 *sativa*; G-Pa, *Poa annua*; G-Ac, *Agropyron cristatum*; Un-G, uncultivated grassland; Na-G, natural grassland.  
 473 Values followed by different lower-case letters within columns and upper-case letters within rows are  
 474 significantly different at  $p < 0.05$ .

| Grassland types | 2008         | 2009          | 2010          | 2011          | 2012         |
|-----------------|--------------|---------------|---------------|---------------|--------------|
| L-CV            | 31.49±0.31dE | 43.10±0.60cD  | 57.92±0.87abC | 66.67±0.17bB  | 79.34±0.80bA |
| L-OV            | 40.05±0.36bB | 48.57±0.41bAB | 55.41±0.41bAB | 63.89±1.09bAB | 72.66±1.38cA |
| L-MS            | 43.75±0.87aE | 53.69±0.89aD  | 63.20±1.28aC  | 77.50±1.62aB  | 83.77±0.76aA |
| G-AC            | 27.11±0.27fE | 30.87±0.60fD  | 37.10±0.60cC  | 42.53±0.33cB  | 48.10±0.82dA |
| G-PA            | 29.29±0.06eC | 30.80±0.36fB  | 31.35±0.19dB  | 35.38±0.06eA  | 35.36±0.37fA |
| Un-G            | 32.03±0.65dD | 33.83±0.18eC  | 33.83±0.52cC  | 38.72±0.17dB  | 43.25±0.22eA |
| Na-G            | 36.25±0.61cB | 38.40±1.25dB  | 39.26±1.61cB  | 44.74±2.00cA  | 45.20±0.98eA |

475 ~~Table 5 Two-way ANOVA F and p values for the effects of plot types, year, and interactions on total~~  
 476 ~~biomass (TB), soil organic carbon content (SOC), soil C storage, and soil bulk density (BD). Bold numbers~~  
 477 ~~indicate statistical significance.~~

478

479

480 **Figure captions**

481 **Fig.1** The studied site localization and schematic figure of the sampling strategies.

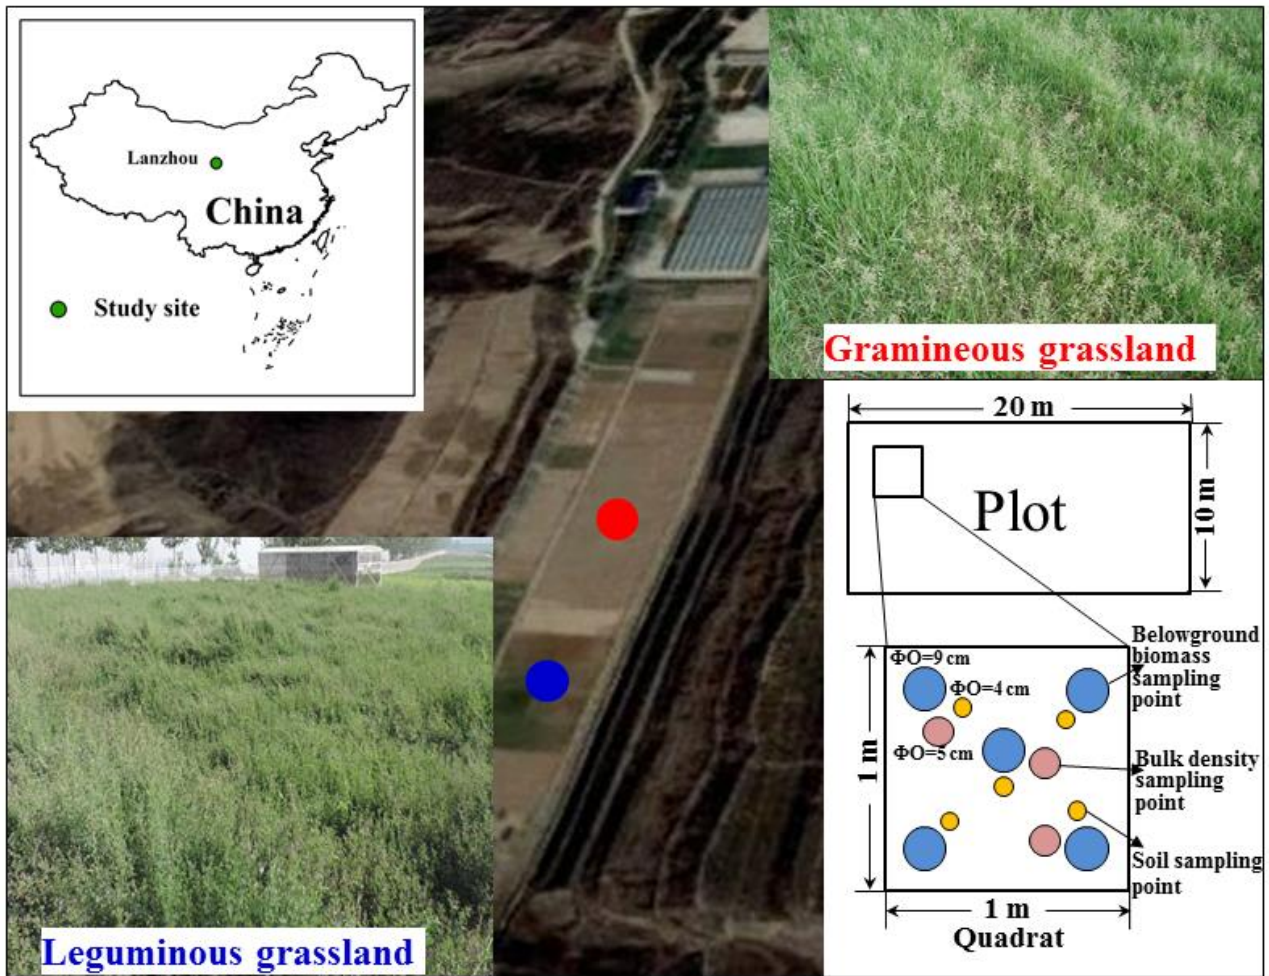

482

483

484 **Fig. 21** Total biomass (a), SOC sequestration (b), SOC sequestration rate (c) and SOC sequestration  
 485 efficiency (d) for different grassland from 2008 to 2012,. Note: The grassland types were: L-Cv, *Coronilla*  
 486 *varia*; L-Ov, *Onobrychis viciaefolia*; L-Ms, *Medicago sativa*; G-Pa, *Poa annua*; G-Ac, *Agropyron cristatum*;  
 487 Un-G, uncultivated grassland; Na-G, natural grassland. Bars indicate mean  $\pm$  standard error. Bars with the  
 488 different lowercase letter above them indicate there was significant difference between the means at  $p < 0.05$   
 489 level. The dotted lines indicate the means of the same grassland types.

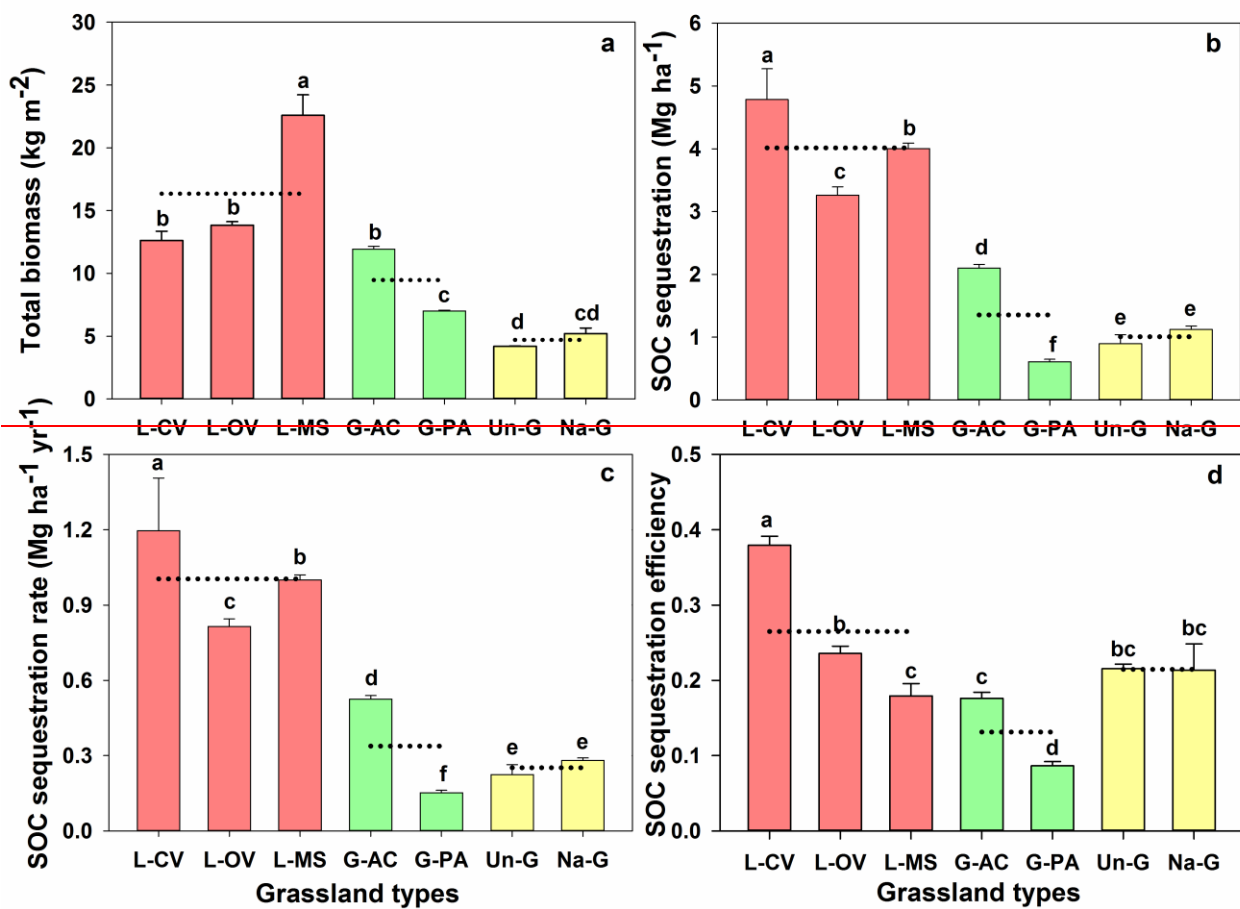

490

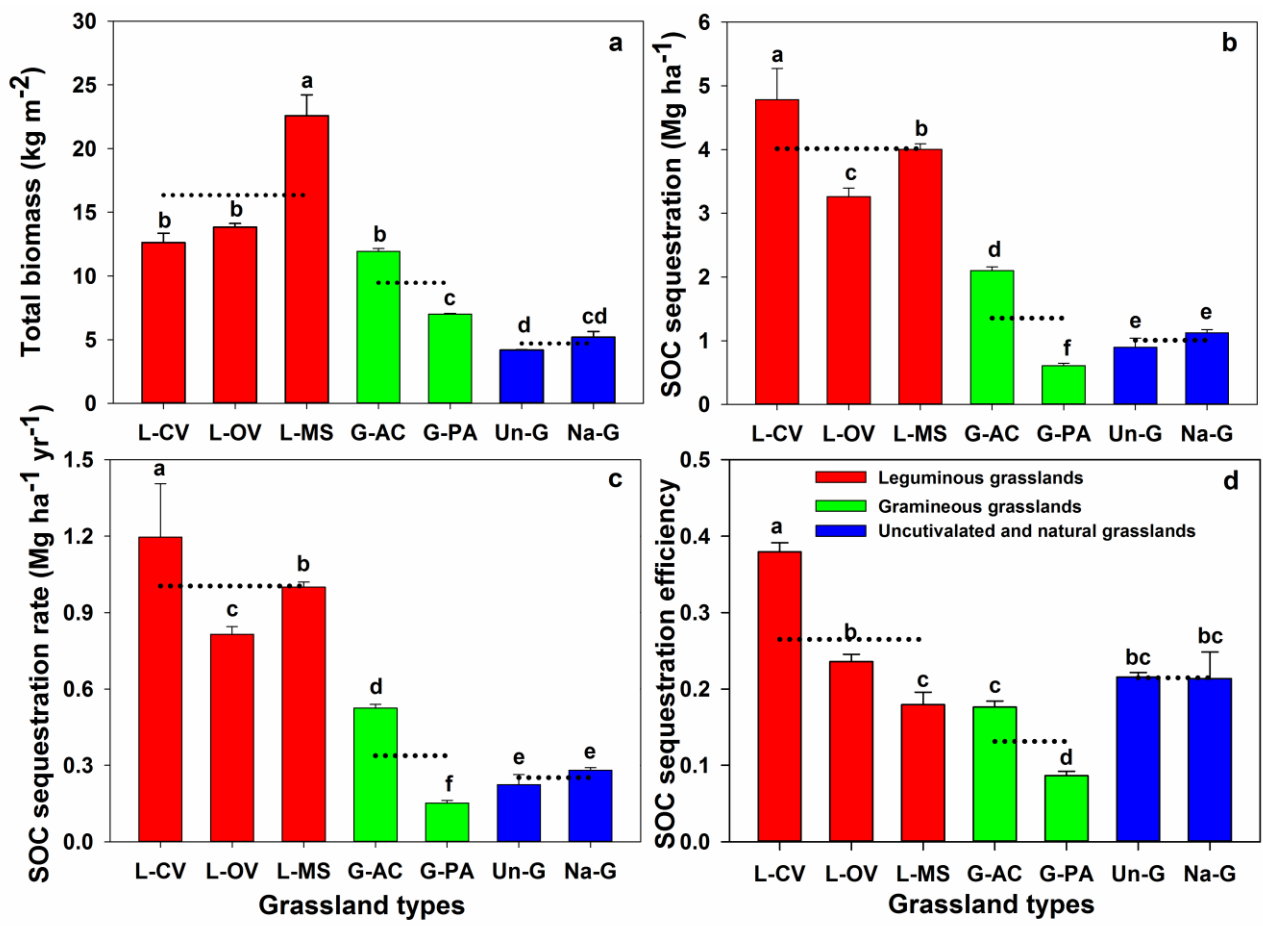

491
